# Supplementary material
Source: publisher site journal article supplement (https://www.spandidos-publications.com/8643/downloadSupplementary)
Supplement: Supplementary file 1 [file downloadSupplementary]

Table SI. Composition analysis of LA20k9 and BMFM.

| Metabolite name and group               | LA20k9 composition | BMFM composition |
|-----------------------------------------|--------------------|------------------|
| Protein, mg/g                           | 418.00             | 484.90           |
| Monosaccharides and disaccharides, mg/g |                    |                  |
| Fructose                                | 21.19              | 23.58            |
| Glucose                                 | 31.19              | 306.56           |
| Sucrose                                 | 19.34              | 47.78            |
| Maltose                                 |                    | 0.29             |
| Organic acids, mg/g                     |                    |                  |
| Tartaric acid                           | 24.47              | 15.01            |
| Malic acid                              | 26.63              |                  |
| Lactic acid                             | 96.31              | 152.07           |
| Pyruvic acid                            | 6.38               | 5.71             |
| Oxalic acid                             | 1.33               | 2.67             |
| Acetic acid                             | 92.92              | 39.74            |
| Citric acid                             | 99.75              | 144.75           |
| Succinic acid                           | 59.17              |                  |
| Propionic acid                          | 35.84              | 30.60            |
| Benzenolactic acid                      | 0.57               | 1.17             |
| Amino acids, mg/g                       |                    |                  |
| Aspartic acid                           | 26.50              | 87.20            |
| Threonine                               | 11.80              | 39.80            |
| Serine                                  | 14.50              | 45.20            |
| Glutamic acid                           | 53.50              | 175.90           |
| Glycine                                 | 40.00              | 72.60            |

|               |       |       |
|---------------|-------|-------|
| Alanine       | 23.80 | 73.90 |
| Cystine       | 0.30  | 7.80  |
| Valine        | 14.80 | 50.80 |
| Methionine    | 5.40  | 14.70 |
| Isoleucine    | 12.20 | 44.90 |
| Leucine       | 21.90 | 67.30 |
| Tyrosine      | 6.90  | 19.20 |
| Phenylalanine | 12.60 | 11.20 |
| Histidine     | 17.70 | 9.30  |
| Lysine        | 18.30 | 16.90 |
| Arginine      | 15.30 | 14.10 |
| Proline       | 35.30 | 33.00 |

LA20k9, Life Age 20k9; BMFM, blank substrate fermentation metabolite.

Table SII. Differential genes of DOX vs. NC.

| Gene name | log <sub>2</sub> (Fold change) | Gene function                                                                                          |
|-----------|--------------------------------|--------------------------------------------------------------------------------------------------------|
| TOB1      | 8.927085672                    | An anti-proliferative protein that negatively regulates cell cycle progression                         |
| UBR4      | 8.824640823                    | An E3 ubiquitin-protein ligase involved in protein degradation and cellular stress responses           |
| TM7SF2    | 8.376097983                    | A transmembrane protein associated with lipid metabolism and membrane homeostasis                      |
| TUBB4B    | 8.181267611                    | A tubulin isoform contributing to microtubule cytoskeleton organization                                |
| PIDD      | 8.051143064                    | A p53-induced death domain protein mediating apoptosis and cell cycle arrest                           |
| FOSL1     | 8.005824614                    | A Fos-like transcription factor regulating cell proliferation and stress responses                     |
| ESYT3     | 7.913758759                    | An extended synaptotagmin involved in membrane trafficking and lipid transport                         |
| FAAH      | 7.874893073                    | A serine hydrolase responsible for the degradation of endocannabinoids and lipid signaling termination |
| CD70      | 7.569743062                    | A transmembrane TNF superfamily ligand mediating T cell co-stimulation and immune regulation           |
| CHRD      | 7.551288373                    | A secreted BMP antagonist regulating dorsal-ventral patterning and embryonic development               |
| WDR75     | -9.185282148                   | A ribosome biogenesis factor required for rRNA processing and ribosomal assembly                       |
| CFI       | -7.697788409                   | A trypsin-like serine protease involved in complement system regulation                                |
| HSPA13    | -7.468369209                   | A heat shock protein 70 family member that mediates protein folding and cellular protection            |
| MSH2      | -6.963739916                   | A core component of the post-replicative DNA mismatch repair system maintaining genomic stability      |
| NOP58     | -6.839301172                   | A ribonucleoprotein essential for ribosome biogenesis and pre-rRNA processing                          |
| CCDC112   | -6.628058119                   | A coiled-coil domain-containing protein implicated in cytoskeletal organization                        |
| SNX2      | -6.396921493                   | A sorting nexin involved in intracellular vesicle trafficking and protein sorting                      |

|        |              |                                                                                                                                   |
|--------|--------------|-----------------------------------------------------------------------------------------------------------------------------------|
| ZNF25  | -6.3741846   | A KRAB-containing C2H2 zinc finger transcription factor regulating RNA polymerase II transcription and osteoblast differentiation |
| ETAA1  | -6.20422276  | An ATR kinase activator mediating replication stress response and genome stability maintenance                                    |
| NUDT12 | -6.095673342 | A pyrophosphohydrolase involved in dinucleotide metabolism and redox homeostasis                                                  |

DOX, doxorubicin, NC, negative control; rRNA, ribosomal RNA.

Table SIII. Differential genes of DOX vs. LA20k9.

| Gene name | log <sub>2</sub> (Fold change) | Gene function                                                                                                                |
|-----------|--------------------------------|------------------------------------------------------------------------------------------------------------------------------|
| EIF3E     | 9.106190487                    | A core subunit of eukaryotic translation initiation factor 3 mediating protein synthesis initiation                          |
| CFI       | 7.501459692                    | Complement factor I regulating immune and inflammatory responses                                                             |
| SULT1C4   | 7.420665137                    | A sulfotransferase involved in metabolism and detoxification                                                                 |
| IMPACT    | 7.179603818                    | A GCN2 inhibitor regulating amino acid sensing and translational control                                                     |
| PPP4R2    | 7.027404486                    | A regulatory subunit of protein phosphatase 4 mediating NF-κB signaling and DNA repair                                       |
| SERINC1   | 6.869860505                    | A membrane protein modulating virus restriction and lipid homeostasis                                                        |
| SLC38A2   | 6.707449805                    | A solute carrier responsible for amino acid transport and nutrient sensing                                                   |
| YME1L1    | 6.439208777                    | A mitochondrial AAA zinc metalloprotease regulating OPA1 processing, cristae structure and respiratory chain quality control |
| SCFD1     | 6.429832626                    | A Sec1/Munc18 family protein controlling ER-Golgi SNARE assembly, retrograde transport and Golgi integrity                   |
| ZC3H15    | 6.404424701                    | A zinc-finger protein involved in mRNA processing and cellular homeostasis                                                   |
| MKI67     | -6.721087417                   | Ki-67, a canonical marker of cell proliferation and active cell cycle progression                                            |
| INPP5J    | -6.535465501                   | An inositol 5-phosphatase regulating phosphoinositide signaling                                                              |
| PLA2G3    | -6.521121991                   | A secretory phospholipase A2 associated with lipid metabolism and inflammation                                               |
| CYR61     | -6.473492476                   | A cellular communication network factor involved in cell adhesion, migration and stress responses                            |
| UBR4      | -6.465897198                   | An E3 ligase associated with protein ubiquitination and stress signaling                                                     |
| TM7SF2    | -6.204851059                   | A transmembrane protein associated with lipid metabolism and membrane homeostasis                                            |
| MVD       | -5.963348698                   | A mevalonate diphosphate decarboxylase responsible for isoprenoid biosynthesis and cholesterol metabolism                    |
| DHCR7     | -5.931949328                   | A 7-dehydrocholesterol reductase mediating cholesterol biosynthesis and Sonic Hedgehog signaling                             |
| FADS2     | -5.928799293                   | A fatty acid desaturase regulating polyunsaturated fatty acid biosynthesis and lipid homeostasis                             |
| FASN      | -5.888018459                   | A fatty acid synthase catalyzing <i>de novo</i> lipogenesis and lipid synthesis                                              |

DOX, doxorubicin; LA20k9, Life Age 20k9.
